# Supplementary material for: Variants ofSCARB1andVDRInvolved in Complex Genetic Interactions May Be Implicated in the Genetic Susceptibility to Clear Cell Renal Cell Carcinoma
Source: Hindawi journal article supplement (doi:10.1155/2015/860405), 2015-01-01
Supplement: f1 [file 860405.f1.pdf]

|             | SNP-ID      | Gene           | Primer sequences                                   | Concentration<br>[ $\mu$ M] |
|-------------|-------------|----------------|----------------------------------------------------|-----------------------------|
| Multiplex 1 |             |                |                                                    |                             |
| 1           | rs11894252  | <i>EPAS1</i>   | CATTGTGCTGTGTGTCTACCC<br>CCCTAACCAGAGGCAGTCAG      | 0.25<br>0.25                |
| 2           | rs7579899   | <i>EPAS1</i>   | TCTGTAGGGCATGACACAGC<br>GCTGCTCTACCCAGGTGACT       | 0.125<br>0.125              |
| 3           | rs3118523   | <i>RXRA</i>    | GGCAGTGGGGTTGATTACTG<br>TCTGTCCTCACCTTCCCTGA       | 0.125<br>0.125              |
| 4           | rs833061    | <i>VEGFA</i>   | TTCGAGAGTGAGGACGTGTG<br>AGGGAGCAGGAAAAGTGAGGT      | 0.1875<br>0.1875            |
| 5           | rs748964    | <i>RXRA</i>    | CTTCCGTGGTCTGGAAAAGG<br>CTCACTCTCACCCCAAGGAC       | 0.25<br>0.25                |
| 6           | rs4765623   | <i>SCARB1</i>  | GCTCAGGGACATCACACGTA<br>GATGCGTTCAGCAGTTCAGA       | 0.125<br>0.125              |
| 7           | rs7105934   | <i>11q13.3</i> | TCAGCTGAGGAATGATGAACA<br>TTCCTGCCCTACAGTCTTG       | 0.25<br>0.25                |
| Multiplex 2 |             |                |                                                    |                             |
| 1           | rs132770    | <i>XRCC6</i>   | TAGAAGCTGGTTGGGGAGTG<br>CTAGCTGGCGAACAACACAA       | 0.25<br>0.25                |
| 2           | rs9904341   | <i>BIRC5</i>   | GCCATTAACCGCCAGATTTG<br>GCAACGTCGGGGCACCCAT        | 0.125<br>0.125              |
| 3           | rs9679290   | <i>EPAS1</i>   | TGTCCCTGAACTGAGGCTCT<br>AAAGACCTTGCTTTGCCAGA       | 0.125<br>0.125              |
| 4           | rs7121      | <i>GNAS1</i>   | CTGACCGCTTTGCTAAATCA<br>CACAAGTCGGGGTGTAGCTT       | 0.125<br>0.125              |
| 5           | rs4953346   | <i>EPAS1</i>   | AGGCATGGTTCTCTGCATAC<br>AACCTCAGCGTCTATGAGTG       | 0.25<br>0.25                |
| 6           | rs1049380   | <i>ITPR2</i>   | AAAAGGGTTTTGTTCCCTCTG<br>CAAGCATTTTCTCATCTAAAAGTGT | 0.25<br>0.25                |
| Multiplex 3 |             |                |                                                    |                             |
| 1           | rs17849897  | <i>ZC3H12A</i> | CCCTTACACGGGCTACAGTC<br>GGGAAACACACCACACAGC        | 0.25<br>0.25                |
| 2           | rs113322875 | <i>ZC3H12A</i> | GCTGGGCTAGGAGCTAGGTT<br>CAGGAAGTTTGAGGCTGGAA       | 0.125<br>0.125              |
| 3           | rs34796867  | <i>ZC3H12A</i> | AGCTGGTGAAACACGGGACA<br>GGGACTAGAGGGAGCTGAG        | 0.0625<br>0.0625            |
| 4           | rs113655247 | <i>ZC3H12A</i> | CCCTTACACGGGCTACAGTC<br>GGGAAACACACCACACAGC        | 0.0625<br>0.0625            |
| 5           | rs34031609  | <i>ZC3H12A</i> | TCATCCCAGTCCAGCTCTCT<br>CTGATGGGGCATAGGTCTGT       | 0.125<br>0.125              |
| 6           | rs12105918  | <i>ZEB2</i>    | CCACTGGAATTAGTACAACAAACAA<br>AGGCAGGAGAATTGCTTGAA  | 0.25<br>0.25                |

**Supplementary Table 1.** PCR primer sequences for three multiplex reactions.

|             | SNP-ID      | Neutral 5'→3'          | Target 5'→3'                                     | Size | Concentration [μM] |
|-------------|-------------|------------------------|--------------------------------------------------|------|--------------------|
| Multiplex 1 |             |                        |                                                  |      |                    |
| 1           | rs11894252  | ----                   | AAAAAATACACACATTTCACT                            | 21   | 1.20               |
| 2           | rs7579899   | ----                   | GAACAGCTTGGTCGCAGTGCT                            | 21   | 0.40               |
| 3           | rs3118523   | (ct) <sub>3</sub>      | CAAGCGGTCCAGTCAGGAGCC                            | 27   | 0.70               |
| 4           | rs833061    | ----                   | TGAGTGAGTGTGTGCGTGTGGGGTTGAGGG                   | 30   | 0.60               |
| 5           | rs748964    | t(ct) <sub>16</sub>    | CAGCACTCAGCCATGTGCGCA                            | 54   | 1.00               |
| 6           | rs4765623   | (ct) <sub>9</sub>      | CTCAGTAGATTTTGCCAGTGGCTCTCC                      | 46   | 0.20               |
| 7           | rs7105934   | (ct) <sub>10</sub>     | GCAGACTTTGAGTCGGCTTCTTAGCA                       | 46   | 1.40               |
| Multiplex 2 |             |                        |                                                  |      |                    |
| 1           | rs132770    | ----                   | GCACATGCGTGATGACGTAG                             | 20   | 0.40               |
| 2           | rs9904341   | t(ct) <sub>2</sub>     | ATTAACCGCCAGATTTGAATCGC                          | 28   | 0.80               |
| 3           | rs9679290   | (ct) <sub>5</sub>      | CAGTGGCCTTGAGGTTTGTGTCAGAA                       | 34   | 0.30               |
| 4           | rs7121      | (ct) <sub>10</sub>     | GAACCAGTTCAGAGTGGACTACAT                         | 44   | 0.40               |
| 5           | rs4953346   | (ct) <sub>13</sub>     | CAGAGCCTCTGTGAGGAATAAATA                         | 50   | 1.00               |
| 6           | rs1049380   | (ct) <sub>13</sub>     | TTATTTTAACTCAGAAAACATACT                         | 50   | 1.00               |
| Multiplex 3 |             |                        |                                                  |      |                    |
| 1           | rs17849897  | CAA                    | GCCTGCTCCTTGCCAGGCTG                             | 24   | 1.4                |
| 2           | rs113322875 | CTGACAA                | CCCCGAGGTGGGTGCGT                                | 24   | 0.15               |
| 3           | rs34796867  | AGTCTGACA<br>A         | GTGAGGTCTGGCGCTCCCGCT                            | 31   | 0.5                |
| 4           | rs113655247 | GTCGTGAAA<br>GTCTGACAA | GGCCAGCACCCATGGCCC                               | 36   | 0.3                |
| 5           | rs34031609  | GTGAAAGTC<br>TGACAA    | AGCTTCTTCCCATCCAGGCTGCACT                        | 40   | 0.1                |
| 6           | rs12105918  | ----                   | CGTGAAAGTCTGACAATGCTATAAGTAACA<br>TGCAGTTGTAAGCC | 44   | 0.8                |

**Supplementary Table 2.** Extension primer sequences for three multiplex reactions.

| Nr                                                                                       | Haplotype | Frequency [%] |
|------------------------------------------------------------------------------------------|-----------|---------------|
| <b>Chromosome 2, EPASI gene: rs11894252, rs7579899</b>                                   |           |               |
| 1                                                                                        | CC        | 64.20         |
| 2                                                                                        | CT        | 0.08          |
| 3                                                                                        | TC        | 0.17          |
| 4                                                                                        | TT        | 35.55         |
| <b>Chromosome 2, EPASI gene: rs9679290, rs4953346</b>                                    |           |               |
| 1                                                                                        | GC        | 0.16          |
| 2                                                                                        | GA        | 54.49         |
| 3                                                                                        | CC        | 45.35         |
| <b>Chromosome 2, EPASI gene: rs11894252, rs7579899, rs9679290, rs4953346</b>             |           |               |
| 1                                                                                        | CCGA      | 44.95         |
| 2                                                                                        | CCCC      | 19.21         |
| 3                                                                                        | CTGA      | 0.27          |
| 4                                                                                        | TCCC      | 0.14          |
| 5                                                                                        | TTGC      | 0.14          |
| 6                                                                                        | TTGA      | 9.54          |
| 7                                                                                        | TTCC      | 25.75         |
| <b>Chromosome 9, RXRA gene: rs748964, rs3118523</b>                                      |           |               |
| 1                                                                                        | GG        | 14.30         |
| 2                                                                                        | GA        | 0.14          |
| 3                                                                                        | CG        | 5.86          |
| 4                                                                                        | CA        | 79.70         |
| <b>Chromosome 12, VDR gene, block 1:<br/>rs739837, rs731236, rs7975232, rs1544410</b>    |           |               |
| 1                                                                                        | CAGC      | 51.63         |
| 2                                                                                        | CAGT      | 0.68          |
| 3                                                                                        | CGGC      | 0.27          |
| 4                                                                                        | CGTT      | 0.27          |
| 5                                                                                        | AAGC      | 0.41          |
| 6                                                                                        | AATC      | 11.04         |
| 7                                                                                        | AATT      | 0.82          |
| 8                                                                                        | AGGT      | 0.14          |
| 9                                                                                        | AGTC      | 0.54          |
| 10                                                                                       | AGTT      | 34.20         |
| <b>Chromosome 12, VDR gene, block 3:<br/>rs2238136, rs4516035, rs7139166, rs11568820</b> |           |               |
| 1                                                                                        | GTCC      | 10.35         |
| 2                                                                                        | GTCT      | 11.58         |
| 3                                                                                        | GTGC      | 0.41          |
| 4                                                                                        | GTGT      | 0.41          |
| 5                                                                                        | GCCC      | 0.54          |
| 6                                                                                        | GCCT      | 0.27          |
| 7                                                                                        | GCGC      | 39.92         |

|    |      |       |
|----|------|-------|
| 8  | ATCC | 30.93 |
| 9  | ATCT | 0.54  |
| 10 | ACCC | 0.41  |
| 11 | ACGC | 4.64  |

**Supplementary Table 3.** Frequency of the haplotypes reconstructed with PHASE v2.1.

| Nr | Locus       | Gene    | Minor Allele | OR (95% CI)*                                         | P value                  |
|----|-------------|---------|--------------|------------------------------------------------------|--------------------------|
| 1  | rs34796867  | ZC3H12A | T            | monomorphic                                          | -                        |
| 2  | rs113322875 | ZC3H12A | A            | monomorphic                                          | -                        |
| 3  | rs34031609  | ZC3H12A | A            | monomorphic                                          | -                        |
| 4  | rs113655247 | ZC3H12A | C            | monomorphic                                          | -                        |
| 5  | rs17849897  | ZC3H12A | T            | 0.793 (0.220-2.860)                                  | 0.724                    |
| 6  | rs12105918  | ZEB2    | G            | 1.198 (0.638-2.262)                                  | 0.579                    |
| 7  | rs11894252  | EPAS1   | T            | 1.142 (0.836-1.560)                                  | 0.405                    |
| 8  | rs7579899   | EPAS1   | T            | 1.185 (0.869-1.617)                                  | 0.284                    |
| 9  | rs9679290   | EPAS1   | C            | 1.259 (0.939-1.687)                                  | 0.124                    |
| 10 | rs4953346   | EPAS1   | C            | 1.247 (0.930-1.672)                                  | 0.140                    |
| 11 | rs3834129   | CASP8   | del          | 1.086 (0.974-1.445)                                  | 0.576                    |
| 12 | rs833061    | VEGFA   | C            | 1.056 (0.789-1.414)                                  | 0.714                    |
| 13 | rs748964    | RXRA    | G            | 0.907 (0.603-1.366)                                  | 0.643                    |
| 14 | rs3118523   | RXRA    | G            | 0.953 (0.660-1.380)                                  | 0.800                    |
| 15 | rs7105934   | 11q13.3 | T            | 0.513 (0.227-1.158)                                  | 0.108                    |
| 16 | rs1049380   | ITPR2   | G            | 1.076 (0.806-1.434)                                  | 0.617                    |
| 17 | rs739837    | VDR     | A            | 0.929 (0.697-1.238)                                  | 0.614                    |
| 18 | rs731236    | VDR     | G            | 1.064 (0.791-1.431)                                  | 0.684                    |
| 19 | rs7975232   | VDR     | T            | 0.967 (0.724-1.291)                                  | 0.821                    |
| 20 | rs1544410   | VDR     | T            | 1.153 (0.861-1.544)                                  | 0.340                    |
| 21 | rs2228570   | VDR     | A            | 1.195 (0.884-1.617)                                  | 0.246                    |
| 22 | rs2238136   | VDR     | A            | 1.086 (0.786-1.501)                                  | 0.615                    |
| 23 | rs4516035   | VDR     | C            | 1.003 (0.741-1.355)                                  | 0.987                    |
| 24 | rs7139166   | VDR     | G            | 0.987 (0.731-1.335)                                  | 0.935                    |
| 25 | rs11568820  | VDR     | T            | 0.833 (0.539-1.286)                                  | 0.409                    |
| 26 | rs4765623   | SCARB1  | A            | 1.321 (0.971-1.798)<br><b>1.688 (1.104-2.582)***</b> | 0.076<br><b>0.016***</b> |
| 27 | N29insA     | MC1R    | A            | monomorphic                                          | -                        |
| 28 | rs1805005   | MC1R    | T            | 1.079 (0.639-1.822)                                  | 0.776                    |
| 29 | rs1805006   | MC1R    | A            | cs**                                                 | 0.209                    |
| 30 | rs2228479   | MC1R    | A            | 1.062 (0.664-1.699)                                  | 0.801                    |
| 31 | rs11547464  | MC1R    | A            | 0.796 (0.131-4.821)                                  | 0.804                    |
| 32 | rs1805007   | MC1R    | T            | 0.973 (0.466-2.030)                                  | 0.941                    |
| 33 | Y152OCH     | MC1R    | A            | monomorphic                                          | -                        |
| 34 | rs1110400   | MC1R    | C            | 1.352 (0.536-3.409)                                  | 0.523                    |
| 35 | rs1805008   | MC1R    | T            | 1.318 (0.744-2.337)                                  | 0.344                    |
| 36 | rs885479    | MC1R    | T            | 1.434 (0.644-3.191)                                  | 0.378                    |
| 37 | rs1805009   | MC1R    | C            | cs**                                                 | 0.209                    |
| 38 | MC1R "R"    | MC1R    | "R"          | 1.227 (0.782-1.927)                                  | 0.373                    |
| 39 | MC1R "r"    | MC1R    | "r"          | 1.182 (0.843-1.657)                                  | 0.332                    |
| 40 | rs9904341   | BIRC5   | C            | 0.984 (0.727-1.332)                                  | 0.918                    |
| 41 | rs7121      | GNAS1   | T            | 1.244 (0.928-1.668)                                  | 0.144                    |
| 42 | rs132770    | XRCC6   | A            | 0.913 (0.599-1.392)                                  | 0.674                    |

**Supplementary Table 4.** Results of association logistic regression analysis between ccRCC status and single polymorphisms. Significant results marked with bold.

\* OR – the allelic odds ratio for the minor allele; CI - confidence interval

\*\* cs – complete separation of the genotypes

\*\*\* dominant model

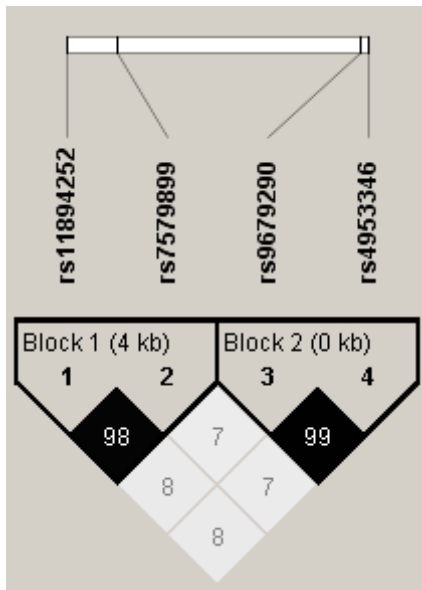

A

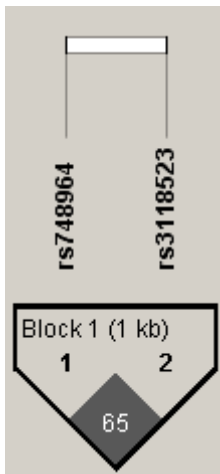

B

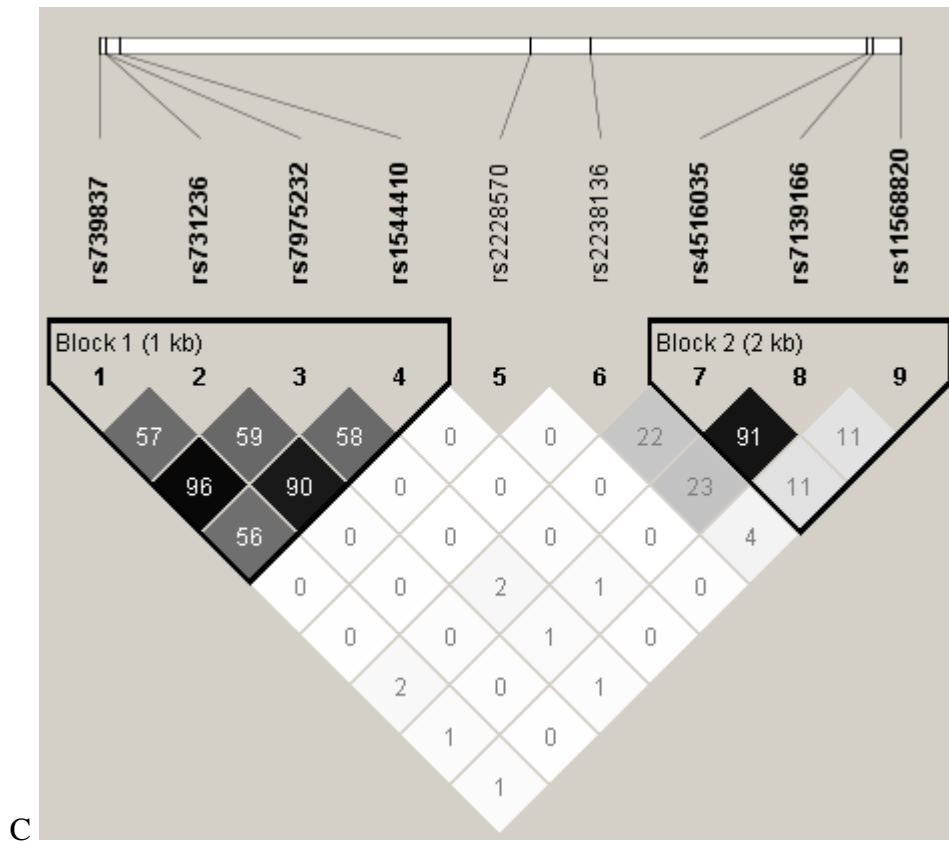

**Supplementary Figure 1.** LD schemes generated with Haploview program for SNPs in *EPASI* (A), *RXRA* (B) and *VDR* (C) genes. Values of  $r^2$  parameter are presented with white colour indicating  $r^2=0$ , shades of grey representing values of  $r^2$  between 0-1 and black colour indicating complete LD with  $r^2=1$ . Values of  $r^2$  are given in percentages.
